# Supplementary material for: PTPσ Controls Presynaptic Organization of Neurotransmitter Release Machinery at Excitatory Synapses
Source: PubMed Central journal article supplement — iScience. 2020 May 28;23(6):101203. doi: 10.1016/j.isci.2020.101203 (PMC7284068; doi:10.1016/j.isci.2020.101203), 2020-05-28
Supplement: mmc1.pdf [file mmc1.pdf]

iScience, Volume 23

## **Supplemental Information**

### **PTP $\sigma$ Controls Presynaptic Organization of Neurotransmitter Release Machinery at Excitatory Synapses**

**Kyung Ah Han, Hee-Yoon Lee, Dongseok Lim, Jungsu Shin, Taek Han Yoon, Chooungku Lee, Jeong-Seop Rhee, Xinran Liu, Ji Won Um, Se-Young Choi, and Jaewon Ko**

## SUPPLEMENTAL FIGURES

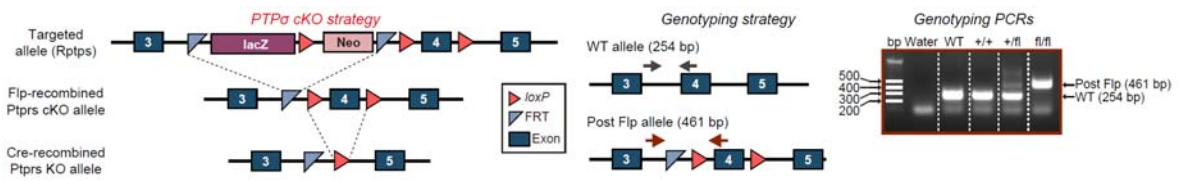

### Supplemental Figure S1. Generation of PTPσ floxed Mice. Related to *All Figures*.

Conditional KO (cKO) strategy for PTPσ mouse lines. Exon 4 of the PTPσ gene was targeted (left). Primer locations for the WT and post Flp alleles are indicated with arrows (middle). PCR genotyping of WT and PTPσ floxed mice (right).

RNAscope ISH in mPFC layers and hippocampus of adult mice

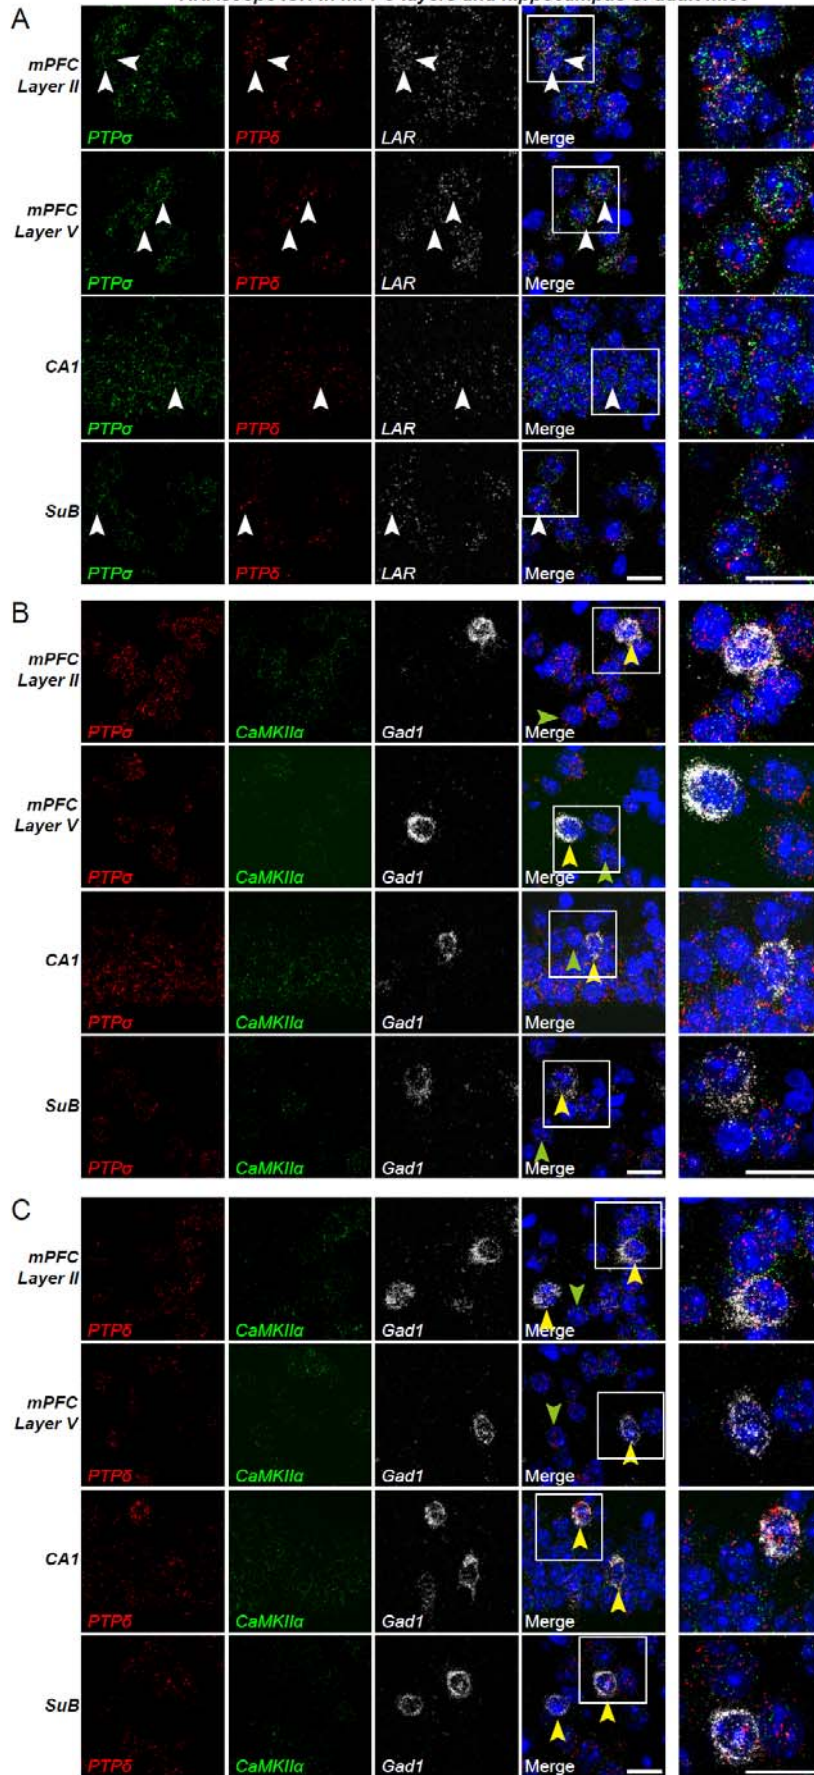

**Supplemental Figure S2. Detection of LAR-RPTP mRNAs in Both Glutamatergic and GABAergic Neurons of Adult Mouse Brain. Related to *All Figures*.**

(A) Representative high-resolution image of adult mouse brain regions (PFC layer II, mPFC layer V, hippocampal CA1, and SuB) visualized with probes targeting PTP $\sigma$  (green), PTP $\delta$  (red) and LAR (white), and counterstained with DAPI (blue). White arrows indicate neurons with single cells expressing PTP $\sigma$ , PTP $\delta$  and LAR mRNAs. Images (boxed in the merged image) on the right side are enlarged to clearly show quadruple labeling at the single-cell level. Scale bar, 20  $\mu$ m.

(B) Representative high-resolution image of the indicated mouse brain regions, showing expression of PTP $\sigma$  (red) in CaMKII $\alpha$ -positive pyramidal neurons (green) and Gad1-positive GABAergic interneurons (white). Images (boxed in the merged image) on the right side are enlarged to clearly show quadruple labeling at the single-cell level. Scale bar, 20  $\mu$ m.

(C) Representative high-resolution image of the indicated mouse brain region, showing expression of PTP $\delta$  (red) in CaMKII $\alpha$ -positive pyramidal neurons (green) and Gad1-positive GABAergic interneurons (white). Images (boxed in the merged image) on the right side are enlarged to clearly show quadruple labeling at the single-cell level. Scale bar, 20  $\mu$ m.

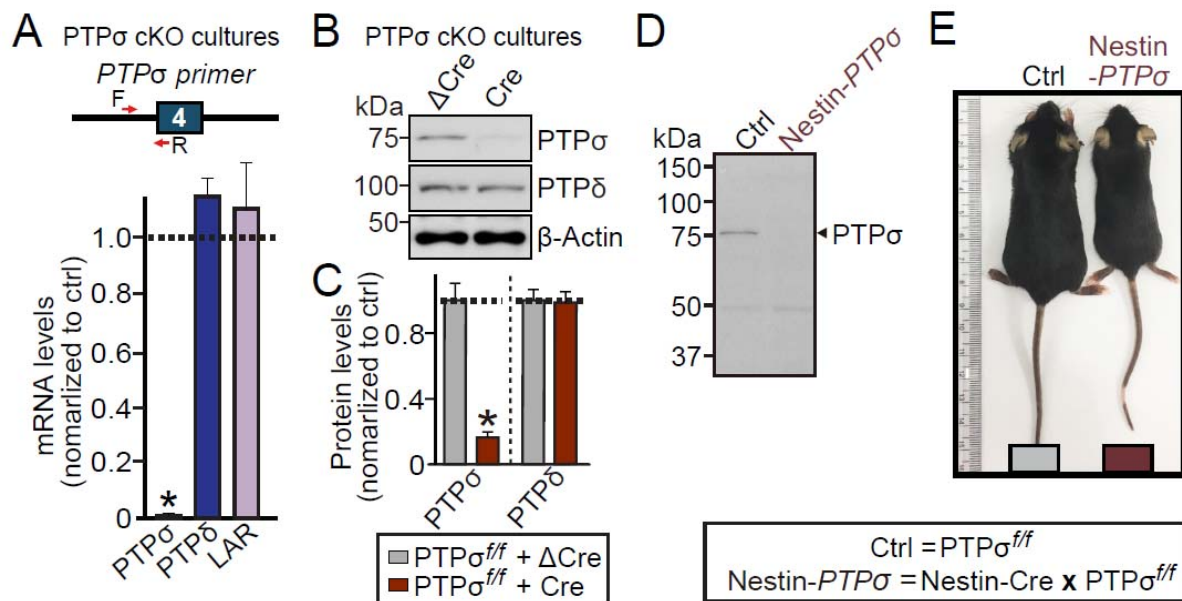

**Supplemental Figure S3. Validation of PTP $\sigma$  cKO Mice. Related to All Figures.**

(A) Quantitative RT-PCR analysis of neuron RNA. Relative levels of PTP $\sigma$ , PTP $\delta$ , and LAR mRNAs were measured in cultured cortical neurons infected with lentiviruses expressing Cre-recombinase. Data are means  $\pm$  SEMs (n = 4 independent experiments).

(B and C) Representative immunoblot image (B) and quantitative analysis (C) of PTP $\sigma$  protein in cultured cortical neurons infected with lentiviruses expressing Cre recombinase.  $\beta$ -actin was used as a loading control. Data are means  $\pm$  SEMs (n = 4 independent experiments).

(D) Representative immunoblot analysis of level of PTP $\sigma$  protein in brain homogenates from 8-week old control and PTP $\sigma$  cKO mice. Levels of PTP $\sigma$  protein was measured in the PTP $\sigma$  floxed mice crossed with *Nestin-Cre* mice (Nestin-PTP $\sigma$ ) or respective PTP floxed mice (Ctrl). Arrows indicate band(s) immunoreactive with PTP $\sigma$ -specific antibody.

(E) Images illustrating the body size of littermate control (Ctrl), Nestin-PTP $\sigma$  mouse at 2 months of age. Nestin-PTP $\sigma$  mouse was significantly smaller than age- and sex-matched Ctrl mice.

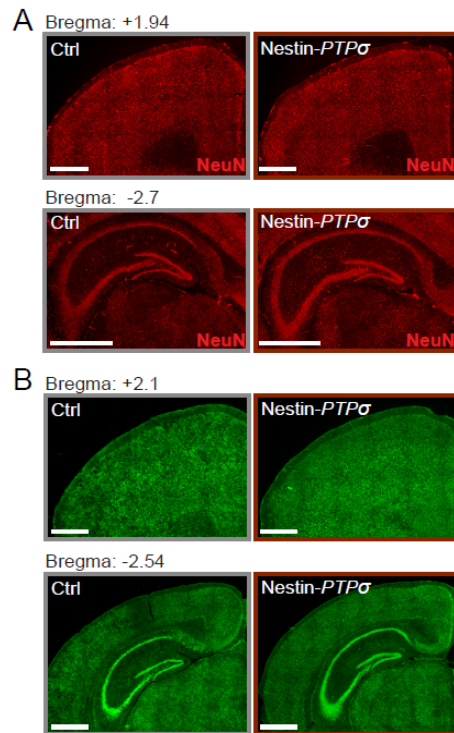

**Supplemental Figure S4. Intact Cytoarchitecture in Conditional  $PTP\sigma$  KO Mice. Related to All Figures.**

(A) Representative images of NeuN staining. Brain sections from  $PTP\sigma^{f/f}$  (Ctrl) and Nestin- $PTP\sigma$  mice were stained with the neuronal marker NeuN (red). Scale bar: 1 mm.

(B) Representative images of Nissl staining. Brain sections from  $PTP\sigma^{f/f}$  (Ctrl) mice and from Nestin- $PTP\sigma$  mice stained with NeuroTrace™ 500/525 Green Fluorescent Nissl Stain solution (green). Scale bar: 1 mm.

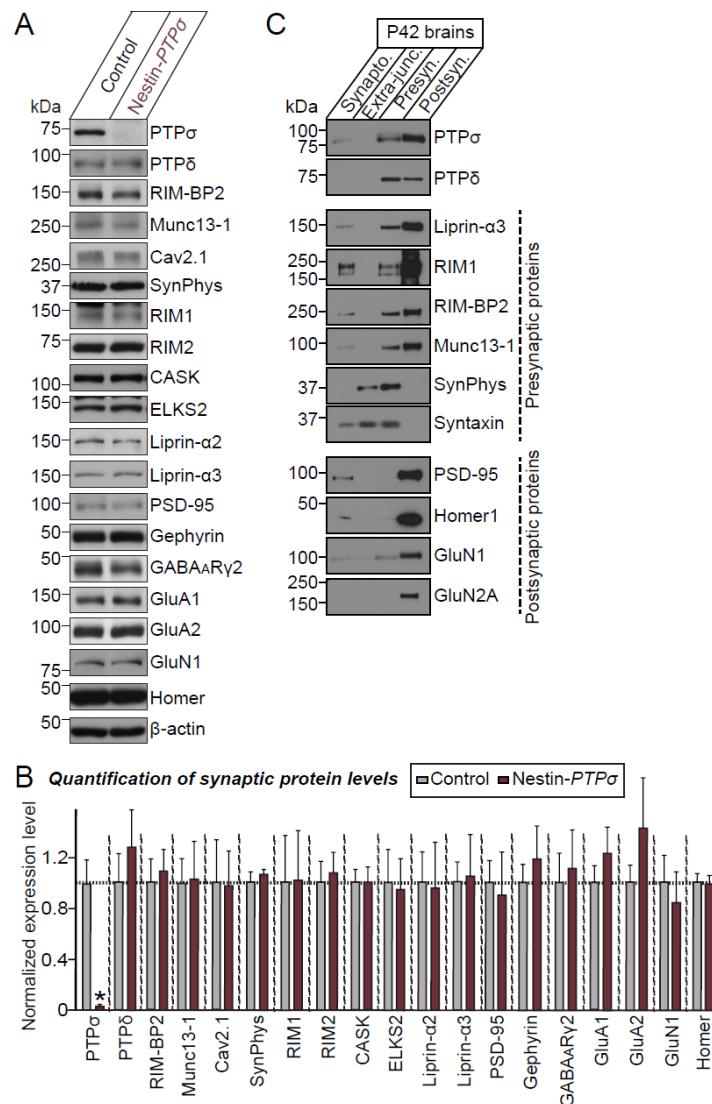

**Supplemental Figure S5. Quantitative Immunoblot Analyses of PTP $\sigma$ -deficient Mouse Brains. Related to *All Figures*.**

(A) Representative images of immunoblot analysis using brain lysates from Nestin-*PTPσ* mice (n = 4 mice per group).

(B) Quantitative immunoblot analysis of PTPs, AZ proteins, and PSD proteins from control and Nestin-*PTPσ* mice. Data are means  $\pm$  SEMs (n = 4 mice per group).

(C) Representative immunoblots of crude synaptosome (Synapto.), extrasynaptic junction (Extra-junc.), presynaptic (Presyn.), and postsynaptic (Postsyn.) fractions of adult mouse

brains. Both PTP $\sigma$  and PTP $\delta$  were present at pre- and postsynaptic sites. Presynaptic active zone proteins and postsynaptic proteins were analyzed in parallel immunoblots.



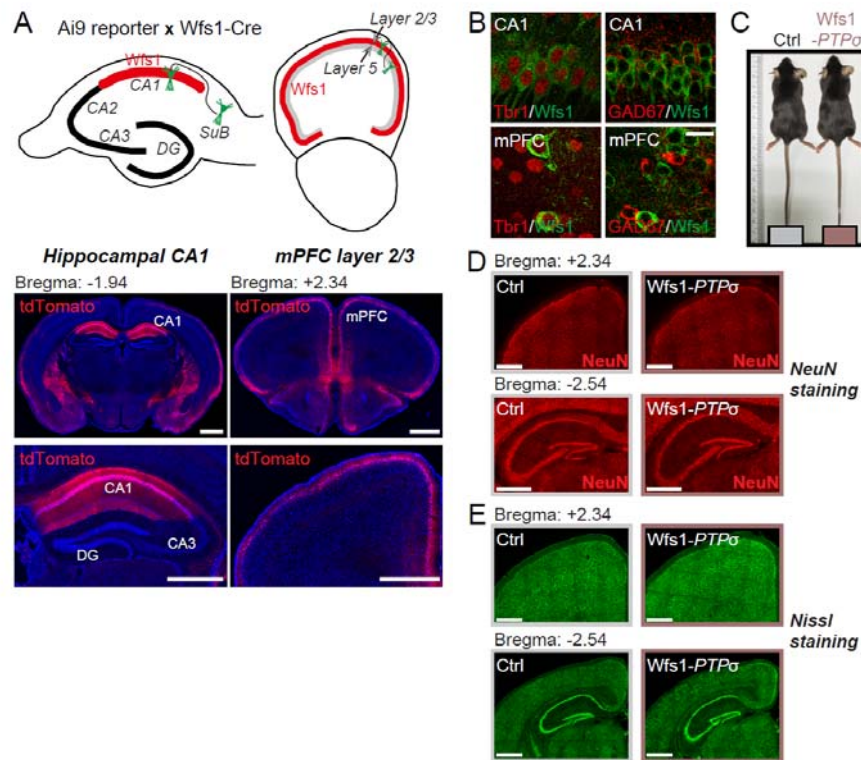

**Supplemental Figure S6. Generation and Characterization of Wfs1-PTP $\sigma$  KO Mice. Related to Figures 4, 5, 6 & 7.**

(A) Schematic diagram (upper panel) and representative images (lower panel) of mice from the Wfs1-Cre driver line intercrossed with Ai9 reporter mice. tdTomato-positive neurons (red) in the hippocampal CA1 and layer II/III of the medial prefrontal cortex (mPFC) were detected by immunofluorescence analysis. Scale bar: 1 mm.

(B) Immunolocalization of Wfs1 protein (green) in mPFC and the hippocampal CA1 region of adult mice. Double immunofluorescence analysis for Tbr1 (red) and GAD67 (red) showed robust expression of Wfs1 in Tbr1-positive pyramidal neurons, but not in GAD67-positive inhibitory neurons. Scale bar: 20  $\mu$ m.

(C) Images illustrating the body size of  $PTP\sigma^{f/f}$  (Ctrl) and Wfs1- $PTP\sigma$  littermates at 7 weeks of age. Body sizes of age- and sex-matched Ctrl and Wfs1- $PTP\sigma$  mice were similar.

(D) Representative images of brain sections from  $PTP\sigma^{f/f}$  (Ctrl) and Wfs1- $PTP\sigma$  mice stained

with the neuronal marker NeuN (red). Scale bar: 1 mm.

(E) Representative images of brain sections from *PTPσ<sup>f/f</sup>* (Ctrl) and *Wfs1-PTPσ* mice stained with NeuroTrace™ 500/525 Green Fluorescent Nissl Stain solution (green). Scale bar: 1 mm.

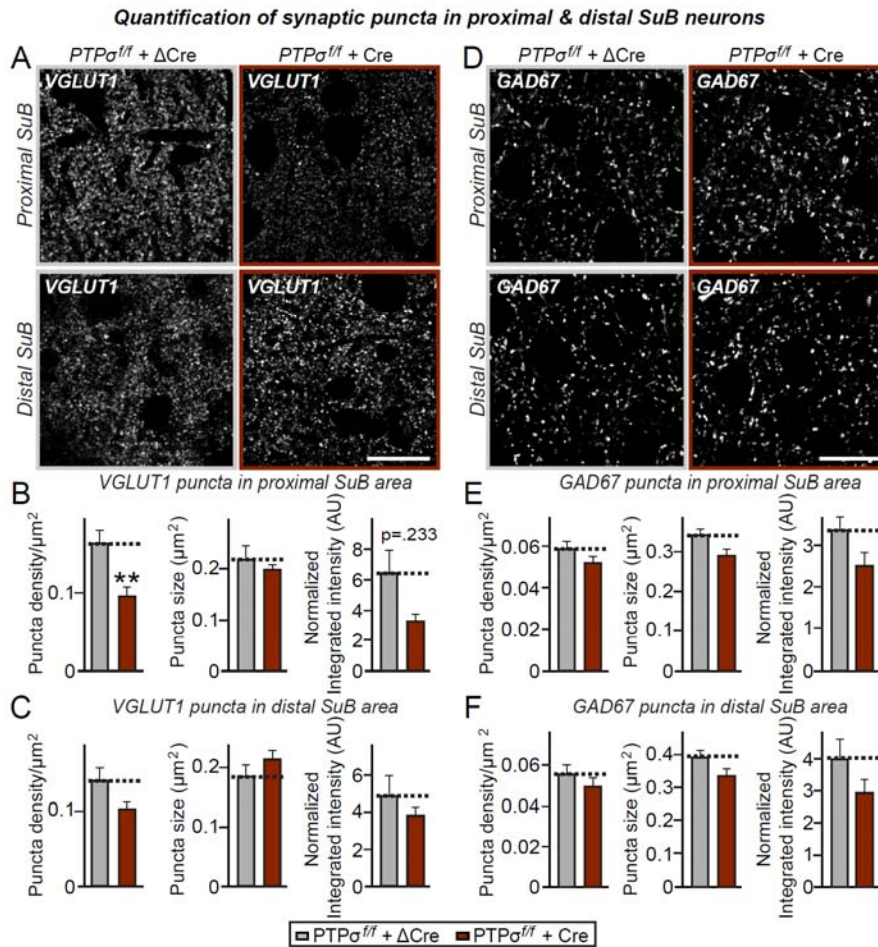

**Supplemental Figure S7. Deletion of PTP $\sigma$  from Hippocampal CA1 Specifically Decreases Innervation of Excitatory Synaptic Inputs on Subicular neurons. Related to Figure 4.**

(A, D) Representative VGLUT1 (A) and GAD67 (D) positive immunofluorescence images of proximal and distal SuB of *PTP $\sigma^{fl/fl}$*  mice injected with AAV- $\Delta$ Cre or AAV-Cre. Scale bar: 20  $\mu\text{m}$ .

(B, E) Quantification of the density, size and integrated intensity of VGLUT1-positive (B) and GAD67-positive (E) synaptic puncta in proximal SuB. Data are means  $\pm$  SEMs (n denotes the number of analyzed brain slices; 18–19 brain slices from 4 mice; \*\* $p < 0.01$ ; Mann Whitney U-test).

(C, F) Quantification of the density, size and integrated intensity of VGLUT1-positive (C) and GAD67-positive (F) synaptic puncta in distal SuB. Data are means  $\pm$  SEMs (n denotes the number of analyzed brain slices; 18–19 brain slices from 4 mice; Mann Whitney U-test).

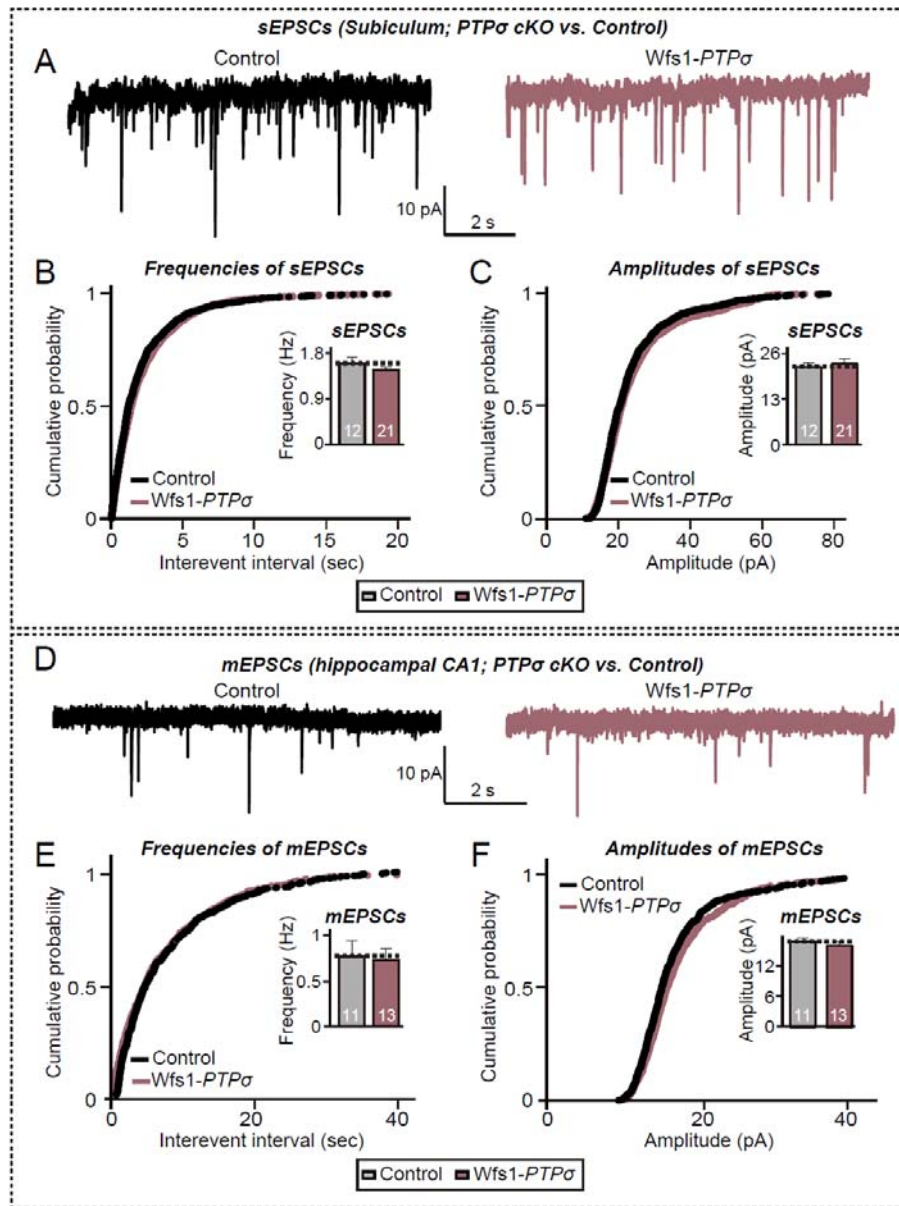

**Supplemental Figure S8. Marginal Effect of Presynaptic Deletion of  $PTP\sigma$  on Excitatory and Inhibitory Synaptic Transmission in Pyramidal Neurons of Hippocampal Subiculum. Related to Figure 4.**

(A–C) Representative sEPSC traces (A) recorded from SuB pyramidal neurons in acute SuB slices from littermate control and Wfs1- $PTP\sigma$  mice, and cumulative distribution of sEPSC frequencies (B) and amplitudes (C). Insets show average sEPSC frequencies (B) and

amplitudes (C). Data are means  $\pm$  SEMs (n denotes the number of analyzed neurons; Control, 12; and *Wfs1-PTP $\sigma$* , 21; two-tailed Student's t-tests).

(D–F) Representative mEPSC traces (D) recorded from CA1 pyramidal neurons in acute CA1 slices from littermate control and *Wfs1-PTP $\sigma$*  mice, and cumulative distribution plots of mEPSC frequencies (E) and amplitudes (F). Insets show average mEPSC frequencies (E) and amplitudes (F). Data are means  $\pm$  SEMs (n denotes the number of analyzed neurons; Control, 11; and *Wfs1-PTP $\sigma$* , 13; two-tailed Student's t-tests).

## TRANSPARENT METHODS

### KEY RESOURCES TABLE

| REAGENT or RESOURCE                                   | SOURCE                   | IDENTIFIER                          |
|-------------------------------------------------------|--------------------------|-------------------------------------|
| <b>Antibodies</b>                                     |                          |                                     |
| Mouse monoclonal Anti-PTP $\sigma$                    | MediMabs                 | Cat #MM-0020; RRID: AB_1808357      |
| Mouse monoclonal Anti-GAD67                           | Millipore                | Cat #MAB5406; RRID: AB_2278725      |
| Rabbit polyclonal Anti-VGLUT1                         | Synaptic Systems         | Cat #135 311; RRID: AB_887880       |
| Guinea pig polyclonal Anti-VGLUT1                     | Millipore                | Cat #AB5905; RRID: AB_2301751       |
| Mouse monoclonal Anti-Gephyrin                        | Synaptic Systems         | Cat #147 011; RRID: AB_887717       |
| Mouse monoclonal Anti-PSD-95                          | NeuroMab                 | Cat #75-028; RRID: AB_2292909       |
| Mouse monoclonal Anti- $\beta$ -Actin                 | Santa Cruz Biotechnology | Cat #sc-47778; RRID: AB_626632      |
| Rabbit polyclonal Anti-GABA <sub>A</sub> R $\gamma$ 2 | Synaptic Systems         | Cat #224 003; RRID: AB_2263066      |
| Mouse monoclonal Anti-Gephyrin                        | Synaptic Systems         | Cat #147 111; RRID: RRID: AB_887719 |
| Mouse monoclonal Anti-Synaptophysin                   | Sigma-Aldrich            | Cat #S5768; RRID: AB_477523         |
| Mouse monoclonal Anti-CASK                            | NeuroMab                 | Cat #75-000; RRID: AB_2068730       |
| Mouse monoclonal Anti-GluN1                           | Millipore                | Cat #MAB363; RRID: AB_94946         |
| Rabbit polyclonal Anti-Cav2.1                         | Synaptic systems         | Cat #152 203; RRID: AB_2619841      |
| Rabbit polyclonal anti-RIM1/2                         | Synaptic Systems         | Cat #140 203; RRID: AB_887775       |
| Rabbit polyclonal anti-Munc 13-1                      | Synaptic systems         | Cat #126 103; RRID: AB_887733       |
| Mouse monoclonal anti-ELKS                            | Sigma-Aldrich            | Cat #E4531; AB_2100013              |
| Rabbit polyclonal anti-GluA1                          | Kim et al., 2009         | 1193; RRID:AB_2722772               |
| Rabbit polyclonal anti-GluA2                          | Kim et al., 2009         | 1195; RRID: AB_2722773              |
| Rabbit polyclonal anti-pan-Shank                      | Kim et al., 2009         | 1172; RRID: AB_2810261              |
| Rabbit polyclonal anti-Homer                          | Lie et al., 2016         | 1133; RRID: AB_2810985              |
| Rabbit polyclonal anti-RIM-BP2                        | Synaptic systems         | Cat #316 103; RRID: AB_2619739      |
| Rabbit polyclonal anti-Liprin- $\alpha$ 2             | Han et al., 2018         | RRID: AB_2810258                    |
| Rabbit polyclonal anti-Liprin- $\alpha$ 3             | Han et al., 2018         | RRID: AB_2810259                    |

|                                                      |                                           |                                    |
|------------------------------------------------------|-------------------------------------------|------------------------------------|
| Mouse monoclonal anti-Syntaxin                       | Synaptic systems                          | Cat # 110 011; RRID: AB_887844     |
| Mouse monoclonal anti-Bassoon                        | Enzo Life Sciences                        | Cat # SAP7F407; RRID: AB_2313990   |
| Rabbit polyclonal anti-GluN2A                        | Millipore                                 | Cat # 07-632; RRID: AB_1121300     |
| Mouse monoclonal anti-NeuN                           | Millipore                                 | Cat # MAB377; RRID: AB_177621      |
| Chicken polyclonal anti-Tbr1                         | Millipore                                 | Cat # AB2261; RRID: AB_10615497    |
| Rabbit polyclonal anti-Wfs1                          | Proteintech                               | Cat # 11558-1-AP RRID: AB_2216046  |
| Rabbit polyclonal Anti-MAP2                          | Abcam                                     | Cat # ab32454; RRID: AB_776174     |
| Mouse monoclonal Anti-MAP2                           | Sigma-Aldrich                             | Cat # M1406; RRID: AB_477171       |
| Cy3 conjugated Donkey Anti-Mouse                     | Jackson<br>ImmunoResearch<br>Laboratories | Cat #715-165-150; RRID: AB_2340813 |
| Cy3 conjugated Donkey Anti-Rabbit                    | Jackson<br>ImmunoResearch<br>Laboratories | Cat #711-165-152; RRID: AB_2307443 |
| Cy3 conjugated Donkey Anti-Guinea pig                | Jackson<br>ImmunoResearch<br>Laboratories | Cat #706-165-148; RRID: AB_2340460 |
| FITC conjugated Donkey Anti-Mouse                    | Jackson<br>ImmunoResearch<br>Laboratories | Cat #715-035-150; RRID: AB_2340770 |
| FITC conjugated Donkey Anti-Rabbit                   | Jackson<br>ImmunoResearch<br>Laboratories | Cat #711-095-152; RRID: AB_2315776 |
| FITC conjugated Donkey Anti-Chicken                  | Jackson<br>ImmunoResearch<br>Laboratories | Cat #703-095-155; RRID: AB_2340356 |
| <b>Chemicals, Peptides, and Recombinant Proteins</b> |                                           |                                    |
| Lipofectamine LTX Reagent with PLUS™<br>Reagent      | ThermoFisher<br>Scientific                | Cat #15338100                      |
| Neurobasal medium                                    | ThermoFisher<br>Scientific                | Cat #21103049                      |
| B-27 supplement (50X)                                | ThermoFisher<br>Scientific                | Cat #17504-044                     |

|                                                  |                         |                   |
|--------------------------------------------------|-------------------------|-------------------|
| Penicillin/Streptomycin                          | ThermoFisher Scientific | Cat #15140122     |
| HBSS (Hanks' Balanced Salt Solution)             | ThermoFisher            | Cat #14065056     |
| GlutaMax Supplement                              | ThermoFisher Scientific | Cat #35050061     |
| Fetal Bovine Serum (FBS)                         | WELGENE                 | Cat #PK004-01     |
| Sodium pyruvate                                  | ThermoFisher Scientific | Cat #11360070     |
| Poly-D-lysine hydrobromide                       | Sigma-Aldrich           | Cat #P0899        |
| Glutaraldehyde solution                          | Sigma-Aldrich           | Cat #G5882        |
| Sodium cacodylate trihydrate                     | Sigma-Aldrich           | Cat #C4945        |
| 2,2,2-Tribromoethanol (Avertin)                  | Sigma                   | Cat #T48402       |
| Ethanol                                          | Millipore               | Cat #1.00983.1011 |
| Vectashield mounting medium                      | Vector Laboratories     | Cat #H-1200       |
| 6-Cyano-7-nitroquinoxaline-2,3-dione (CNQX)      | Sigma-Aldrich           | Cat #C127         |
| 2,3-Dioxo-6-nitro-1,2,3,4-tetrahydrobenzo (NBQX) | Hello Bio               | Cat #HB0443       |
| Tetrodotoxin (TTX)                               | Tocris                  | Cat #1069         |
| Bicuculline                                      | Tocris                  | Cat #0130         |
| Picrotoxin                                       | Tocris                  | Cat #1128         |
| QX-314                                           | Tocris                  | Cat #1014         |
| D-2-amino-5-phosphonovalerate (D-AP5)            | Tocris                  | Cat #0106         |
| <b>Critical Commercial Assays</b>                |                         |                   |
| ReverTra Ace- $\alpha$ Kit                       | Toyobo                  | Cat #FSQ-301      |
| CalPhos Transfection Kit                         | Takara                  | Cat #631312       |
| <b>Experimental Models: Cell Lines</b>           |                         |                   |
| HEK 293T cells                                   | ATCC                    | Cat # CRL-3216    |
| Cultured neurons (from mouse embryos)            | N/A                     | N/A               |
| <b>Experimental Models: Organisms/Strains</b>    |                         |                   |



|                                         |                            |                                                                                 |
|-----------------------------------------|----------------------------|---------------------------------------------------------------------------------|
| Mouse: <i>PTPσ<sup>ff</sup></i>         | KOMP Repository Collection | N/A                                                                             |
| Mouse: <i>Wfs1-cre</i>                  | Kitamura et al., 2014      | N/A                                                                             |
| Mouse: <i>Nestin-cre</i>                | The Jackson Laboratory     | Cat #003771                                                                     |
| Mouse: <i>Ai9 reporter</i>              | The Jackson Laboratory     | Cat #007909                                                                     |
| <b>Recombinant DNA</b>                  |                            |                                                                                 |
| pAAV-hSyn-ΔCre-GFP                      | Xu and Südhof, 2013        | N/A                                                                             |
| pAAV-hSyn-Cre-GFP                       | Xu and Südhof, 2013        | N/A                                                                             |
| FSW-ΔCre                                | Ko et al., 2011            | N/A                                                                             |
| FSW-Cre                                 | Ko et al., 2011            | N/A                                                                             |
| L-313 PTPσ WT                           | Han et al., 2018           | N/A                                                                             |
| L-313 PTPσ C1157S                       | Han et al., 2018           | N/A                                                                             |
| L-313 PTPσ ΔD2                          | Han et al., 2018           | N/A                                                                             |
| pCAGG-VGLUT1-Venus                      | This study                 | N/A                                                                             |
| <b>Sequence-Based Reagents</b>          |                            |                                                                                 |
| <i>Tptprs</i> mouse probe (for qRT-PCR) | This study                 | N/A                                                                             |
| <i>Tptprd</i> mouse probe (for qRT-PCR) | This study                 | N/A                                                                             |
| <i>Tptprf</i> mouse probe (for qRT-PCR) | This study                 | N/A                                                                             |
| <b>Software and Algorithms</b>          |                            |                                                                                 |
| MetaMorph                               | Molecular Devices          | <a href="https://www.moleculardevices.com">https://www.moleculardevices.com</a> |
| ImageJ                                  | NIH                        | <a href="https://imagej.nih.gov/ij/">https://imagej.nih.gov/ij/</a>             |
| GraphPad Prism 8.0                      | GraphPad                   | <a href="https://www.graphpad.com">https://www.graphpad.com</a>                 |
| Clampfit 10.5                           | Molecular Devices          | <a href="https://www.moleculardevices.com">https://www.moleculardevices.com</a> |
| AxoGraph                                | AxoGraph Scientific        | <a href="https://axograph.com/">https://axograph.com/</a>                       |

## EXPERIMENTAL MODEL AND SUBJECT DETAILS

### Cell Culture

HEK293T cells were cultured in Dulbecco's Modified Eagle's Medium (DMEM; WELGENE) supplemented with 10% fetal bovine serum (FBS; WELGENE) and 1% penicillin-streptomycin (Thermo Fisher) at 37°C in a humidified 5% CO<sub>2</sub> atmosphere. Cultured primary hippocampal neurons were prepared from embryonic day 17 (E17)  $PTP\sigma^{f/f}$  mice.

### Animals

The use and care of animals complied with the guidelines and protocols (DGIST-IACUC-17122104-01) for rodent experimentation approved by the Institutional Animal Care and Use Committee of DGIST under standard, temperature-controlled laboratory conditions.  $PTP\sigma$  conditional knockout mice were purchased from The KOMP Repository Collection (UC Davis, USA). Ai9 reporter mice were purchased from Jackson Research Laboratories (007909). Nestin-Cre (003771, Jackson Research Laboratories) mice were the gift of Dr. Albert Chen (DUKE-NUS, Singapore).  $Wfs1$ -Cre mice were the gift of Dr. Susumu Tonegawa (Massachusetts Institute of Technology, USA). Mice were kept on a 12:12 light/dark cycle (lights on at 9:00 am), and received water and food *ad libitum*. Floxed  $PTP\sigma$  ( $PTP\sigma^{f/f}$ ) were generated by flanking exon 4 with loxP sites (See **Figs. S1** for details). Nestin-Cre driver line was crossed with  $PTP\sigma^{f/f}$  mice to generate pan-neuronal  $PTP\sigma$  knockout.  $Wfs1$ -Cre driver line was crossed with  $PTP\sigma^{f/f}$  mice to generate mPFC and CA1-specific knockout. Mice were maintained in the C57BL/6N background. Breeding cages are maintained by crossing male  $PTP\sigma^{f/f}$  with female  $PTP\sigma^{f/+}::Nestin$  HET (generated by crossing  $PTP\sigma^{f/WT}$  with heterozygous Nestin-Cre transgenic mice), or male  $PTP\sigma^{f/f}$  with female  $PTP\sigma^{f/f}::Wfs1$  HET (generated by crossing  $PTP\sigma^{f/f}$  with heterozygous  $Wfs1$ -Cre transgenic mice) mice. All experimental procedures were performed on male mice, using

littermate control without Cre expression.

## METHOD DETAILS

**Construction of Expression Vectors.** 1. *PTP $\sigma$  rescue constructs.* The lentiviral PTP $\sigma$  rescue vectors were previously described (Han et al., 2018). 2. *Others.* The plasmids pAAV-hSyn- $\Delta$ Cre-GFP and pAAV-hSyn-Cre-GFP were from Dr. Thomas C. Südhof (Stanford University, Palo Alto, CA, USA); FSW- $\Delta$ Cre and FSW-Cre were from Dr. Pascal S. Kaeser (Harvard University, Cambridge, MA, USA); and pCAGG-VGLUT1-Venus was from Dr. Franck Polluex (Columbia University, New York, NY, USA).

**Antibodies.** Commercially obtained antibodies included: mouse monoclonal anti-GAD67 (clone 1G10.2; Millipore; RRID: AB\_2278725), guinea pig polyclonal anti-VGLUT1 (Millipore; RRID: AB\_2301751), rabbit polyclonal anti-VGLUT1 (Synaptic Systems; RRID: AB\_887880), rabbit polyclonal anti-GABA<sub>A</sub>R $\gamma$ 2 (Synaptic Systems; RRID: AB\_2263066), mouse monoclonal anti-PSD-95 (clone K28/43; Neuromab; RRID: AB\_2292909), mouse monoclonal anti-PTP $\sigma$  (clone 17G7.2; MediMabs; RRID: AB\_1808357), mouse monoclonal anti-CASK (clone K56A/50; NeuroMab; RRID: AB\_2068730), mouse monoclonal anti-HA (clone 16B12; BioLegend; RRID: AB\_2565006); mouse monoclonal anti-Bassoon (clone SAP7F407; Enzo Life Sciences; RRID: AB\_2313990), mouse monoclonal anti-Syntaxin (clone SAP7F407; Enzo Life Sciences; RRID: AB\_887844), mouse monoclonal anti-NeuN (clone A60; Millipore; RRID: AB\_177621), chicken polyclonal anti-Tbr1 (Millipore; RRID: AB\_177621), rabbit polyclonal anti-Wfs1 (Proteintech; AB\_2216046), goat polyclonal anti-GFP (Rockland; AB\_218182), rabbit polyclonal anti-GluN2A (Millipore; AB\_11213002), rabbit polyclonal anti-Munc13-1 (Synaptic Systems; RRID: AB\_887733), rabbit polyclonal anti-RIM-BP2 (Synaptic Systems; RRID: AB\_2619739), rabbit

polyclonal anti-RIM1/2 (Synaptic Systems; RRID: AB\_887775), mouse monoclonal anti-ELKS (Sigma-Aldrich; RRID: AB\_2100013), mouse monoclonal anti-Synaptophysin (clone SVP-38; Sigma-Aldrich; RRID: AB\_477523), mouse monoclonal anti-MAP2 (clone AP-20; Sigma-Aldrich; RRID: AB\_477171), rabbit polyclonal anti-MAP2 (Abcam; RRID: AB\_776174), mouse monoclonal anti- $\beta$ -actin (clone C4; Santa Cruz Biotechnology; RRID: AB\_626632), mouse monoclonal GluN1 (clone 54.1; Millipore; RRID: AB\_94946), rabbit polyclonal Cav2.1 (Synaptic Systems; RRID: AB\_2619841), and mouse monoclonal anti-Gephyrin (clone 3B11; Synaptic Systems; RRID: AB\_887717). Rabbit polyclonal anti-liprin- $\alpha$ 2 (RRID:AB\_2810258) and rabbit polyclonal anti-liprin- $\alpha$ 3 (RRID:AB\_2810259) antibodies were gifts of Dr. Susanne Schoch-McGovern (Bonn, Germany); rabbit polyclonal anti-pan-Shank (1172; RRID: AB\_2810261), rabbit polyclonal anti-GluA1 (1193; RRID: AB\_2722772), rabbit polyclonal anti-GluA2 (1195; RRID: AB\_2722773), and rabbit polyclonal anti-Homer1 antibodies (1133; RRID: AB\_2810985) were the gifts of Dr. Eunjoon Kim (KAIST, Korea).

**Chemicals.** 6-Cyano-7-nitroquinoxaline-2,3-dione (CNQX) was obtained from Sigma-Aldrich (Cat No. C127). Tetrodotoxin (TTX; Cat No. 1069); picrotoxin (Cat No. 1128), QX-314 (Cat No. 1014); and D-2-amino-5-phosphonovalerate (D-AP5; Cat No. 0106) were purchased from Tocris.

**Neuron Culture, Transfections, Imaging, and Quantitation.** Hippocampal and cortical mouse neuron cultures were prepared from embryonic day 17 (E1) mouse embryos, as described previously (Ko et al., 2011). Mouse cultured neurons were seeded onto coverslips coated with poly-D-lysine (Sigma-Aldrich), and grown in Neurobasal medium supplemented with B-27 (Thermo Fisher), 0.5% FBS (WELGENE), 0.5 mM GlutaMAX (Thermo Fisher), and sodium pyruvate (Thermo Fisher). Cultured neurons (mostly excitatory neurons) were infected with lentiviruses at DIV3–4. For

immunocytochemistry, cultured neurons were fixed with 4% paraformaldehyde/4% sucrose in PBS for 10–30 min at 4°C, and permeabilized with 0.2% Triton X-100 in PBS for 10–30 min at 4°C. Neurons were blocked with 3% horse serum/0.1% BSA in PBS for 15 min at room temperature and incubated with primary and secondary antibodies in blocking solution for 70 min at room temperature. The primary antibodies used in these experiments included anti-VGLUT1 (Synaptic Systems; 1:700), anti-GAD67 (Millipore; 1:100), anti-GABA<sub>A</sub>R $\gamma$ 2 (Synaptic Systems; 1:500), anti-GluA1 (1193; 1:200), anti-Gephyrin (Synaptic Systems; 1:100), and anti-pan-Shank (1172; 1:200). Images of randomly selected neurons were acquired using a confocal microscope (LSM800, Carl Zeiss) with a 63 × objective lens; all image settings were kept constant during image acquisition. Z-stack images obtained by confocal microscopy were converted to maximal projections, and puncta size and the density of the indicated presynaptic marker proteins were analyzed in a blinded manner using MetaMorph software (Molecular Devices Corp.).

**Production of Lentiviruses.** Lentiviruses were produced by transfecting HEK293T cells with three plasmids—lentivirus vectors, psPAX2, and pMD2.G—at a 2:2:1 ratio. After 72 h, lentiviruses were harvested by collecting the media as previously described (Han et al., 2018; Hsia et al., 2014).

**Production of Adeno-associated Viruses.** HEK293T cells were co-transfected with the indicated AAV vectors, pHelper and AAV1.0 (serotype 2/9) capsids vectors. After 72 hours, the transfected HEK293T cells were collected, and resuspended in PBS, and lysed by subjecting them to four freeze-thaw cycles in an ethanol/dry ice bath (7 minutes each) and a 37°C water bath (5 min). The lysates were centrifuged and the supernatants were mixed with 40% polyethylene glycol and 2.5 M NaCl and centrifuged at 2000 × g for 30 min. The cell pellets were resuspended in HEPES buffer (20 mM HEPES, 115 mM NaCl, 1.2 mM CaCl<sub>2</sub>, 1.2 mM MgCl<sub>2</sub>, and 2.4 mM KH<sub>2</sub>PO<sub>4</sub>, pH 8.0) to which was added an equal volume of chloroform. The mixture was centrifuged at 400 × g for 5 min and concentrated

three times with a Centriprep centrifugal filter (Cat. 4310, Millipore) at  $1,220 \times g$  (20 min each) and an Amicon Ultra centrifugal filter (Cat. UFC500396, Millipore) at  $16,000 \times g$  for 30 min. AAVs were titered by treating 1  $\mu$ l of concentrated, filter-sterilized AAVs with 1  $\mu$ l of DNase I (AMPD1; Sigma) for 30 min at 37 °C to eliminate any contaminating plasmid DNA. After treatment with 1  $\mu$ l of stop solution (50 mM ethylenediaminetetraacetic acid) for 10 min at 65 °C, 10  $\mu$ g of protease K (Cat. P2308; Sigma) was added and the sample was incubated for 1 h at 50°C. Reactions were stopped by heat inactivation at 95 °C for 20 min. The final virus titer was quantified by qRT-PCR. Empty AAV vector was used to generate a standard curve for qRT-PCRs targeting *GFP* sequences.

**qRT-PCRs.** Cultured rat cortical neurons were infected with recombinant lentiviruses at DIV4 and harvested at DIV13 for qRT-PCR using SYBR green qPCR master mix (TaKaRa). Total RNA was extracted from mouse cortical neurons using TRIzol reagent (Invitrogen) according to the manufacturer's protocol. Briefly, cells in each well of a 12-well plate of cultured neurons were harvested and incubated with 500  $\mu$ l TRIzol reagent at room temperature for 5 minutes. After phenol-chloroform extraction, RNA in the upper aqueous phase was precipitated. cDNA was synthesized from 500 ng of RNA by reverse transcription using a ReverTra Ace- $\alpha$  kit (Toyobo). Quantitative PCR was performed on a CFX96 Touch Real-Time PCR system (BioRad) using 0.5  $\mu$ l of cDNA. The ubiquitously expressed  $\beta$ -actin was used as an endogenous control. The sequences of the primer pairs used were: mouse *Ptprs*, 5'-ATCAGAGAGCCCAAGGATCA-3' (forward) and 5'-GCCACACACTCGTACACGTT-3' (reverse); mouse *Ptprd*, 5'-CTCCTTGATCCCCATCTCTG-3' (forward) and 5'-CAG GGCAGCCACTAAACTTC-3' (reverse); and mouse *Ptprf*, 5'- CCCGATGGCTGAGTACAACA-3' (forward) and 5'-CATCCCGGGCGTCTGTGA-3' (reverse).

**Electron Microscopy.** E17 embryonic hippocampi of *PTP $\sigma^{ff}$*  mice were seeded onto 18 mm coverslips at densities of 40,000 cells/well. The neurons were infected with lentiviral vectors expressing  $\Delta$ Cre or

Cre at DIV4. At DIV14, cultured neurons were fixed in 2% glutaraldehyde, 0.1 M Na-cacodylate buffer, pH 7.4, for 1 h at room temperature and overnight at 4°C. The cells were post-fixed in 0.5% OsO<sub>4</sub> (osmium tetroxide), 0.8% K ferricyanide at room temperature for 60 min. All specimens were stained *en bloc* with 2% aqueous uranyl acetate for 30 min, dehydrated in a graded ethanol series up to 100%, embedded in Embed 812 resin (Electron Microscopy Science, PA), and polymerized overnight in a 60 °C oven. Thin sections (50–60 nm) were cut with a Leica ultramicrotome and post-stained with uranyl acetate and lead citrate. Sample grids were examined using a FEI Tecnai BioTWIN transmission electron microscope running at accelerating voltage of 80 kV. Images were recorded with a Morada CCD camera and iTEM (Olympus) software. This protocol allowed the unambiguous staining of membranes of synaptic vesicles as well as of pre- and post-synaptic compartments, resulting in accurate measurements of the nanoscale organization of the synaptic vesicles within nerve endings. To analyze synapse ultrastructure, the lengths of active zone and PSD, tethered vesicles, the membrane proximal vesicles, and total vesicle numbers were quantified using MetaMorph software (Molecular Devices Corp.). The numbers of total vesicles and docked vesicles were counted manually, and the distances from the active zone and the PSD to the vesicle center were measured. Vesicles located below 200 nm were considered membrane-proximal vesicles.

**RNAscope Analyses.** RNAscope analyses of mouse brains were performed using RNAscope<sup>®</sup> Fluorescent Multiplex Assay kits (Advanced Cell Diagnostics) according to the manufacturer's direction. Briefly, within 5 min of dissection, mouse brains were immersed in cryo-embedding medium and frozen on dry ice. Brain tissue was sliced into 20 µm-thick coronal sections using a cryotome (Model CM-3050-S; Leica Biosystems), mounted, and dried at –20°C for 10 min. Tissue samples were fixed with 4% formaldehyde for 15 minutes at 4°C and dehydrated by incubation at room temperatures (RT) in 50% EtOH for 5 min, in 70% EtOH for 5 min, and twice 100% EtOH for 5 min. The fixed samples were treated with protease IV for 30 min at RT and

washed twice with 1X PBS. To detect RNA, the sections were incubated in different amplifier solutions in a HybEZ hybridization oven (Advanced Cell Diagnostics) at 40°C. Three synthetic oligonucleotides complementary to nucleotide residues 1051–1947 of Mm-*Ptprs*-C1, 1329–2486 of Mm-*Ptprd*-C1 and Mm-*Ptprd*-C2, and 4001–5386 of Mm-*Ptprf*-C3 (Advanced Cell Diagnostics) were labeled by conjugation to Alexa Fluor 488, Altto 550 and Altto 647, and the labeled probe mixtures were hybridized by tissue samples by incubating them with slide-mounted sections for 2 hours at 40°C. Nonspecifically hybridized probes were removed by washing the sections three times for 2 minutes each with 1X wash buffer at RT, followed by incubations at 40°C with Amplifier 1-FL for 30 minutes, Amplifier 2-FL for 15 minutes, Amplifier 3-FL for 30 minutes, and Amplifier 4 Alt B-FL for 15 minutes. Each amplifier was removed by washing twice in 1X wash buffer at RT. The fluorescence images were acquired using a LSM 800 microscope (Carl Zeiss).

**Stereotaxic Surgery and Virus Injections.** 6–7-week-old mice were anesthetized by intraperitoneal injection of 2% 2,2,2-tribromoethanol (Sigma), dissolved in saline, and secured in a stereotaxic apparatus. Viral solutions were injected using a Nanoliter 2010 Injector (World Precision Instruments), including a NanoFil syringe and 33 gauge needle, at a flow rate of 50 nl/min (injected volume, 500 nl). The coordinates used for stereotaxic injections targeting the ventral hippocampal CA1 were, relative to the bregma, anteroposterior (AP) -3.1 mm; medial–lateral (ML),  $\pm$  3.2 mm; and dorsal–ventral (DV), -2.5 mm. Immunohistochemical analyses were performed 3 weeks later.

**Immunohistochemistry.** Male mice aged 8–10-weeks were anesthetized and immediately perfused, first with PBS for 5 minutes and then with 4% paraformaldehyde for 5 minutes. Their brains were removed, fixed overnight in 4% paraformaldehyde, incubated overnight in 30% sucrose (in PBS), and



sliced into 35- $\mu$ m-thick coronal sections using a cryotome (Model CM-3050-S; Leica Biosystems). The sections were permeabilized in PBS containing 0.5% Triton X-100 for 1 h and blocked in PBS containing 5% bovine serum albumen and 5% horse serum for 1 minutes. The brain sections were incubated overnight with primary antibodies for overnight at 4 °C. The following primary antibodies were used: anti-VGLUT1 (1:200), anti-GAD67 (1:100). The brain sections were washed three times with PBS and incubated with the appropriate Cy3-conjugated secondary antibodies (Jackson ImmunoResearch) for 2 hours at RT. After three washes with PBS, the sections were counterstained with DAPI (4',6-diamidino-2-phenylindole) and mounted onto glass slides (Superfrost Plus; Fisher Scientific) with Vectashield mounting medium (H-1200; Vector Laboratories).

***In Vitro and Ex Vivo Electrophysiology. 1. Electrophysiology of Primary Cultured Neurons.***

Hippocampal neurons obtained from PTP $\sigma$  cKO mice were infected on DIV4 with lentiviruses encoding Cre-EGFP or dCre-EGFP, followed by analysis at DIV13-16. Pipettes were pulled from borosilicate glass (o.d. 1.5 mm, i.d. 0.86 mm; Sutter Instrument), using a Model P-97 pipette puller (Sutter Instrument). The resistance of pipettes filled with internal solution varied between 3-6 M $\Omega$ . The internal solution (in mM) contained 145 CsCl, 5 NaCl, 10 HEPES, 10 EGTA, 0.3 Na-GTP, and 4 Mg-ATP with pH adjusted to 7.2–7.4 with CsOH, and an osmolarity of 290–295 mOsmol/L. The external solution (in mM) consisted of 130 NaCl, 4 KCl, 2 CaCl<sub>2</sub>, 1 MgCl<sub>2</sub>, 10 HEPES, and 10 D-glucose with pH adjusted to 7.2–7.4 with NaOH, and an osmolarity of 300–305 mOsmol/L. Whole-cell configuration was generated at RT using MPC-200 manipulators (Sutter Instrument) and a Multiclamp 700B amplifier (Molecular Devices). mEPSCs, mIPSCs, and sucrose EPSCs were recorded at a holding potential of -70 mV. For sucrose puffing, 500 mM sucrose was applied directly on the dendritic field of the patched neurons at a puff pressure of 6–8 psi using a PV-820 Pneumatic Picopump system (World Precision Instruments). Receptor-mediated synaptic responses were pharmacologically isolated by applying drug

combinations of 50  $\mu\text{M}$  picrotoxin, 10  $\mu\text{M}$  CNQX, 50  $\mu\text{M}$  D-APV and/or 1  $\mu\text{M}$  tetrodotoxin. Synaptic currents were analyzed offline using Clampfit 10.5 (Molecular Devices) software. 2. Acute Slice Electrophysiology. Transverse hippocampal formation (300  $\mu\text{m}$ ) were prepared from 10–12-week-old male mice, as described (Noh et al., 2019). The mice were anesthetized with isoflurane and decapitated, and their brains were rapidly removed and placed in ice-cold, oxygenated (95%  $\text{O}_2$ /5%  $\text{CO}_2$ ), low- $\text{Ca}^{2+}$ /high- $\text{Mg}^{2+}$  dissection buffer (in mM) containing 5 KCl, 1.23  $\text{NaH}_2\text{PO}_4$ , 26  $\text{NaHCO}_3$ , 10 dextrose, 0.5  $\text{CaCl}_2$ , 10  $\text{MgCl}_2$ , and 212.7 sucrose. Slices were transferred to a holding chamber in an incubator containing oxygenated (95%  $\text{O}_2$ /5%  $\text{CO}_2$ ) artificial cerebrospinal fluid (ACSF in mM) containing 124 NaCl, 5 KCl, 1.23  $\text{NaH}_2\text{PO}_4$ , 2.5  $\text{CaCl}_2$ , 1.5  $\text{MgCl}_2$ , 26  $\text{NaHCO}_3$ , and 10 dextrose at 28–30°C for at least 1 h before recording. After > 1 h incubation in ACSF, slices were transferred to a recording chamber with continuous perfusion (2 ml/min) by ACSF oxygenated with 95%  $\text{O}_2$ /5%  $\text{CO}_2$  at 23–25°C. All recordings were performed on pyramidal neurons in the subiculum or hippocampal CA1 area identified by their size and morphology. Patch pipettes (4–6  $\text{M}\Omega$ ) were filled with a solution (in mM) containing 130 Cs-MeSO<sub>4</sub>, 0.5 EGTA, 5 TEA-Cl, 8 NaCl, 10 HEPES, 1 QX-314, 4 ATP-Mg, 0.4 GTP-Na, and 10 phosphocreatine-Na<sub>2</sub> to record mEPSCs and AMPA/NMDA ratio; 135 K-gluconate, 8 NaCl, 10 HEPES, 2 ATP-Na and 0.2 GTP-Na to record sEPSCs and eEPSC-PPRs with pH 7.4 and an osmolarity of 280–290 mOsmol/L. The extracellular recording solution consisted of ACSF supplemented with picrotoxin (100  $\mu\text{M}$ ) for sEPSCs, and with TTX (1  $\mu\text{M}$ ), DL-AP5 (50  $\mu\text{M}$ ), and picrotoxin (100  $\mu\text{M}$ ) for measuring mEPSCs. Evoked synaptic responses were elicited by stimulation (0.2 ms current pulses) using a concentric bipolar electrode placed 200–300  $\mu\text{m}$  in front of postsynaptic pyramidal neurons at intensities that produced 40–50% of the maximal EPSC amplitude. Recordings were obtained using a Multiclamp 700B amplifier (Molecular Devices) under visual control with differential interference contrast illumination on an upright microscope (BX51WI; Olympus). Data were acquired and analyzed using pClamp 10.7

(Molecular Devices). Signals were filtered at 3 kHz and digitized at 10 kHz with DigiData 1550

(Molecular Devices).

## QUANTIFICATION AND STATISTICAL ANALYSIS

**Data Analysis and Statistics.** All data are expressed as means  $\pm$  SEM. All experiments were repeated using at least three independent cultures, and data were statistically evaluated using a Mann-Whitney *U* test, analysis of variance (ANOVA) followed by Tukey's *post hoc* test, Kruskal-Wallis test (one-way ANOVA on ranks), paired two-tailed t-test (for electrophysiology experiments), or one-way ANOVA with Bonferroni's *post hoc* test (for behavior experiments), as appropriate. Prism8 (GraphPad Software) was used for analysis of data and preparation of bar graphs. *P* values < 0.05 were considered statistically significant (individual *p* values are presented in figure legends).

## SUPPLEMENTAL REFERENCES

Han, K.A., Ko, J.S., Pramanik, G., Kim, J.Y., Tabuchi, K., Um, J.W., and Ko, J. (2018). PTPsigma Drives Excitatory Presynaptic Assembly via Various Extracellular and Intracellular Mechanisms. *J. Neurosci.* 38, 6700-6721.

Hsia, H.E., Kumar, R., Luca, R., Takeda, M., Courchet, J., Nakashima, J., Wu, S., Goebbels, S., An, W., Eickholt, B.J., *et al.* (2014). Ubiquitin E3 ligase Nedd4-1 acts as a downstream target of PI3K/PTEN-mTORC1 signaling to promote neurite growth. *Proc. Natl. Acad. Sci. U S A* 111, 13205-13210.

Kim, M.H., Choi, J., Yang, J., Chung, W., Kim, J.H., Paik, S.K., Kim, K., Han, S., Won, H., Bae, Y.S., *et al.* (2009). Enhanced NMDA receptor-mediated synaptic transmission, enhanced long-term potentiation, and impaired learning and memory in mice lacking IRSp53. *J. Neurosci.* 29, 1586-1595.

Kitamura, T., Pignatelli, M., Suh, J., Kohara, K., Yoshiki, A., Abe, K., and Tonegawa, S. (2014). Island cells control temporal association memory. *Science* 343, 896-901.

Ko, J., Soler-Llavina, G.J., Fuccillo, M.V., Malenka, R.C., and Südhof, T.C. (2011). Neuroligins/LRRTMs prevent activity- and Ca<sup>2+</sup>/calmodulin-dependent synapse elimination in cultured neurons. *J. Cell Biol.* 194, 323-334.

Lie, E., Ko, J.S., Choi, S.Y., Roh, J.D., Cho, Y.S., Noh, R., Kim, D., Li, Y., Kang, H., Choi, T.Y., *et al.* (2016). SALM4 suppresses excitatory synapse development by cis-inhibiting trans-synaptic SALM3-LAR adhesion. *Nat. Commun.* 7, 12328.

Noh, K., Lee, H., Choi, T.Y., Joo, Y., Kim, S.J., Kim, H., Kim, J.Y., Jahng, J.W., Lee, S., Choi, S.Y., and Lee, S.J. (2019). Negr1 controls adult hippocampal neurogenesis and affective behaviors. *Mol. Psychiatry* 24, 1189-1205.

Xu, W., and Südhof, T.C. (2013). A neural circuit for memory specificity and generalization. *Science* 339, 1290-1295.
